# Supplementary material
Source: Springer Nature journal article supplement (https://www.springermedizin.de/resource/supplementary/13054_2013_2857_MOESM1_ESM.pdf/9713804)
Supplement: MOESM1 [file 9713804]

**A)***protein C (%)*

55

45

*Mild**Mild**Moderate**Mild**Moderate**Moderate**Moderate**Moderate**Severe*

650

900

*presepsin (pg/mL)***B)***protein C (%)*

55

45

*non-SEDIC**non-SEDIC**pre-SEDIC**non-SEDIC**pre-SEDIC**pre-SEDIC**pre-SEDIC**pre-SEDIC**SEDIC*

650

900

*presepsin (pg/mL)*
